# Supplementary material
Source: publisher site journal article supplement (https://www.dovepress.com/article/348843)
Supplement: Supplementary file 1 [file get_supplementary_file.php]

Supplementary Table 1. The number of normal samples and tumor samples of 24 tumors were included in the statistical analysis

| CancerType | Normal | Tumor |
| --- | --- | --- |
| BLCA | 19 | 411 |
| BRCA | 113 | 1104 |
| CESC | 3 | 306 |
| CHOL | 9 | 36 |
| COAD | 41 | 471 |
| ESCA | 10 | 162 |
| GBM | 5 | 168 |
| HNSC | 44 | 502 |
| KICH | 24 | 65 |
| KIRC | 72 | 535 |
| KIRP | 32 | 289 |
| LIHC | 50 | 374 |
| LUAD | 59 | 526 |
| LUSC | 49 | 501 |
| PAAD | 4 | 178 |
| PCPG | 3 | 183 |
| PRAD | 52 | 499 |
| READ | 10 | 167 |
| SARC | 2 | 263 |
| SKCM | 1 | 471 |
| STAD | 32 | 375 |
| THCA | 58 | 510 |
| THYM | 2 | 119 |
| UCEC | 35 | 548 |

Supplementary Table 2. Expression of SPINDOC in 24 tumors

| CancerType | logFC | P-Value |
| --- | --- | --- |
| BLCA | 0.794697 | 2.36E-08 |
| BRCA | 0.762243 | 1.32E-33 |
| CESC | 0.476455 | 0.093229 |
| CHOL | 1.914586 | 2.26E-09 |
| COAD | 1.2617 | 1.40E-21 |
| ESCA | 1.164389 | 1.28E-06 |
| GBM | 0.097206 | 0.558928 |
| HNSC | 1.322566 | 7.81E-23 |
| KICH | 0.312801 | 0.026187 |
| KIRC | 0.401932 | 2.24E-14 |
| KIRP | 0.551283 | 3.38E-10 |
| LIHC | 1.004993 | 2.53E-20 |
| LUAD | 0.727285 | 8.14E-20 |
| LUSC | 1.323459 | 2.16E-28 |
| PAAD | 0.022035 | 0.866628 |
| PCPG | 1.128369 | 0.003762 |
| PRAD | 0.020413 | 0.920164 |
| READ | 1.188696 | 6.42E-07 |
| SARC | 1.08164 | 0.040237 |
| SKCM | 0.083365 | 0.831454 |
| STAD | 0.716971 | 1.01E-08 |
| THCA | 0.203886 | 2.62E-06 |
| THYM | 0.139078 | 0.535229 |
| UCEC | 0.785138 | 1.06E-14 |

Supplementary Table 3. Results of univariate regression analysis of SPINDOC in 24 tumors

| cancer | HR | HR.95L | HR.95H | pvalue |
| --- | --- | --- | --- | --- |
| BLCA | 1.009942 | 0.778504 | 1.310184 | 0.940615 |
| BRCA | 1.189764 | 0.932644 | 1.51777 | 1.62E-01 |
| CESC | 1.060021 | 0.716148 | 1.569012 | 0.770804 |
| CHOL | 1.684464 | 0.789438 | 3.594228 | 1.77E-01 |
| COAD | 1.397648 | 0.991735 | 1.969701 | 0.055806 |
| ESCA | 1.096278 | 0.759679 | 1.582018 | 0.623288 |
| GBM | 1.173914 | 0.822393 | 1.675687 | 0.377198 |
| HNSC | 1.209071 | 0.994413 | 1.470066 | 0.056939 |
| KICH | 1.943141 | 0.724196 | 5.213782 | 0.187114 |
| KIRC | 2.422897 | 1.73434 | 3.384821 | 2.13E-07 |
| KIRP | 2.949684 | 1.800826 | 4.831468 | 1.74E-05 |
| LIHC | 1.659517 | 1.336196 | 2.061072 | 4.62E-06 |
| LUAD | 1.215402 | 0.976494 | 1.512762 | 0.080647 |
| LUSC | 0.95999 | 0.761034 | 1.210958 | 0.730399 |
| PAAD | 0.675893 | 0.409976 | 1.114289 | 0.12461 |
| PCPG | 19.04996 | 2.755041 | 131.7226 | 0.002815 |
| PRAD | 1.652306 | 0.353023 | 7.733541 | 0.523662 |
| READ | 1.313911 | 0.599042 | 2.881873 | 0.495704 |
| SARC | 1.260401 | 0.864636 | 1.837317 | 0.228759 |
| SKCM | 1.121013 | 0.892923 | 1.407367 | 0.325019 |
| STAD | 0.85234 | 0.658571 | 1.103121 | 0.224694 |
| THCA | 0.613462 | 0.133688 | 2.815021 | 0.529623 |
| THYM | 0.087534 | 0.015032 | 0.509734 | 0.006736 |
| UCEC | 1.283649 | 0.917825 | 1.795282 | 1.45E-01 |

Supplementary Table 4. GSEA analysis results of SPINDOC

| NAME | SIZE | ES | NES | NOM p-val | FDR q-val |
| --- | --- | --- | --- | --- | --- |
| KEGG_OOCYTE_MEIOSIS | 110 | 0.46584034 | 1.7410734 | 0.002074689 | 1 |
| KEGG_REGULATION_OF_ACTIN_CYTOSKELETON | 211 | 0.4200023 | 1.5927536 | 0.00409836 | 0.4244606 |
| KEGG_ENDOCYTOSIS | 176 | 0.42566913 | 1.5913804 | 0.006276151 | 0.39129174 |
| KEGG_VASOPRESSIN_REGULATED_WATER_REABSORPTION | 44 | 0.5289228 | 1.6468769 | 0.006329114 | 1 |
| KEGG_PROGESTERONE_MEDIATED_OOCYTE_MATURATION | 85 | 0.45198697 | 1.6615599 | 0.008350731 | 1 |
| KEGG_ADHERENS_JUNCTION | 68 | 0.48897973 | 1.6210208 | 0.010526316 | 0.47968382 |
| KEGG_INOSITOL_PHOSPHATE_METABOLISM | 54 | 0.4965714 | 1.6360104 | 0.012474013 | 0.68655026 |
| KEGG_PATHOGENIC_ESCHERICHIA_COLI_INFECTION | 55 | 0.48500478 | 1.5579841 | 0.020576132 | 0.41238403 |
| KEGG_UBIQUITIN_MEDIATED_PROTEOLYSIS | 129 | 0.4598004 | 1.6004333 | 0.023305085 | 0.44339308 |
| KEGG_FC_GAMMA_R_MEDIATED_PHAGOCYTOSIS | 92 | 0.49082986 | 1.605333 | 0.025210084 | 0.47609144 |
| KEGG_PATHWAYS_IN_CANCER | 321 | 0.3685731 | 1.4491149 | 0.02736842 | 0.42748836 |
| KEGG_PANCREATIC_CANCER | 69 | 0.48206043 | 1.5710729 | 0.029166667 | 0.41191357 |
| KEGG_HOMOLOGOUS_RECOMBINATION | 26 | 0.60525864 | 1.6429621 | 0.029350106 | 0.8092355 |
| KEGG_NEUROTROPHIN_SIGNALING_PATHWAY | 125 | 0.43643847 | 1.5314287 | 0.030800821 | 0.42491478 |
| KEGG_NOTCH_SIGNALING_PATHWAY | 47 | 0.4716057 | 1.528584 | 0.034552846 | 0.40542126 |
| KEGG_CELL_CYCLE | 124 | 0.49414635 | 1.6288234 | 0.039748956 | 0.51592404 |
| KEGG_PURINE_METABOLISM | 152 | 0.35377955 | 1.4824935 | 0.04025424 | 0.49522603 |
| KEGG_SPLICEOSOME | 123 | 0.53835756 | 1.6355727 | 0.041493777 | 0.5762832 |
| KEGG_NOD_LIKE_RECEPTOR_SIGNALING_PATHWAY | 60 | 0.46762645 | 1.5482436 | 0.044624746 | 0.40995604 |
| KEGG_GNRH_SIGNALING_PATHWAY | 101 | 0.38400722 | 1.44366 | 0.044715445 | 0.42242485 |
| KEGG_RENAL_CELL_CARCINOMA | 66 | 0.44580397 | 1.4748381 | 0.062626265 | 0.4436988 |
| KEGG_EPITHELIAL_CELL_SIGNALING_IN_HELICOBACTER_PYLORI_INFECTION | 67 | 0.41147923 | 1.4189994 | 0.06526316 | 0.40243775 |
| KEGG_CHRONIC_MYELOID_LEUKEMIA | 73 | 0.43077987 | 1.4357381 | 0.06967213 | 0.4249158 |
| KEGG_LONG_TERM_POTENTIATION | 69 | 0.39103723 | 1.3996017 | 0.07024793 | 0.4012989 |
| KEGG_RNA_DEGRADATION | 54 | 0.46603847 | 1.4803545 | 0.07280514 | 0.4747538 |
| KEGG_COLORECTAL_CANCER | 62 | 0.4235232 | 1.4593298 | 0.072916664 | 0.4398397 |
| KEGG_ERBB_SIGNALING_PATHWAY | 86 | 0.3978716 | 1.4194736 | 0.07444668 | 0.41481367 |
| KEGG_WNT_SIGNALING_PATHWAY | 149 | 0.35925642 | 1.3720396 | 0.0785124 | 0.41919392 |
| KEGG_DORSO_VENTRAL_AXIS_FORMATION | 24 | 0.47944194 | 1.4187846 | 0.079918034 | 0.39016485 |


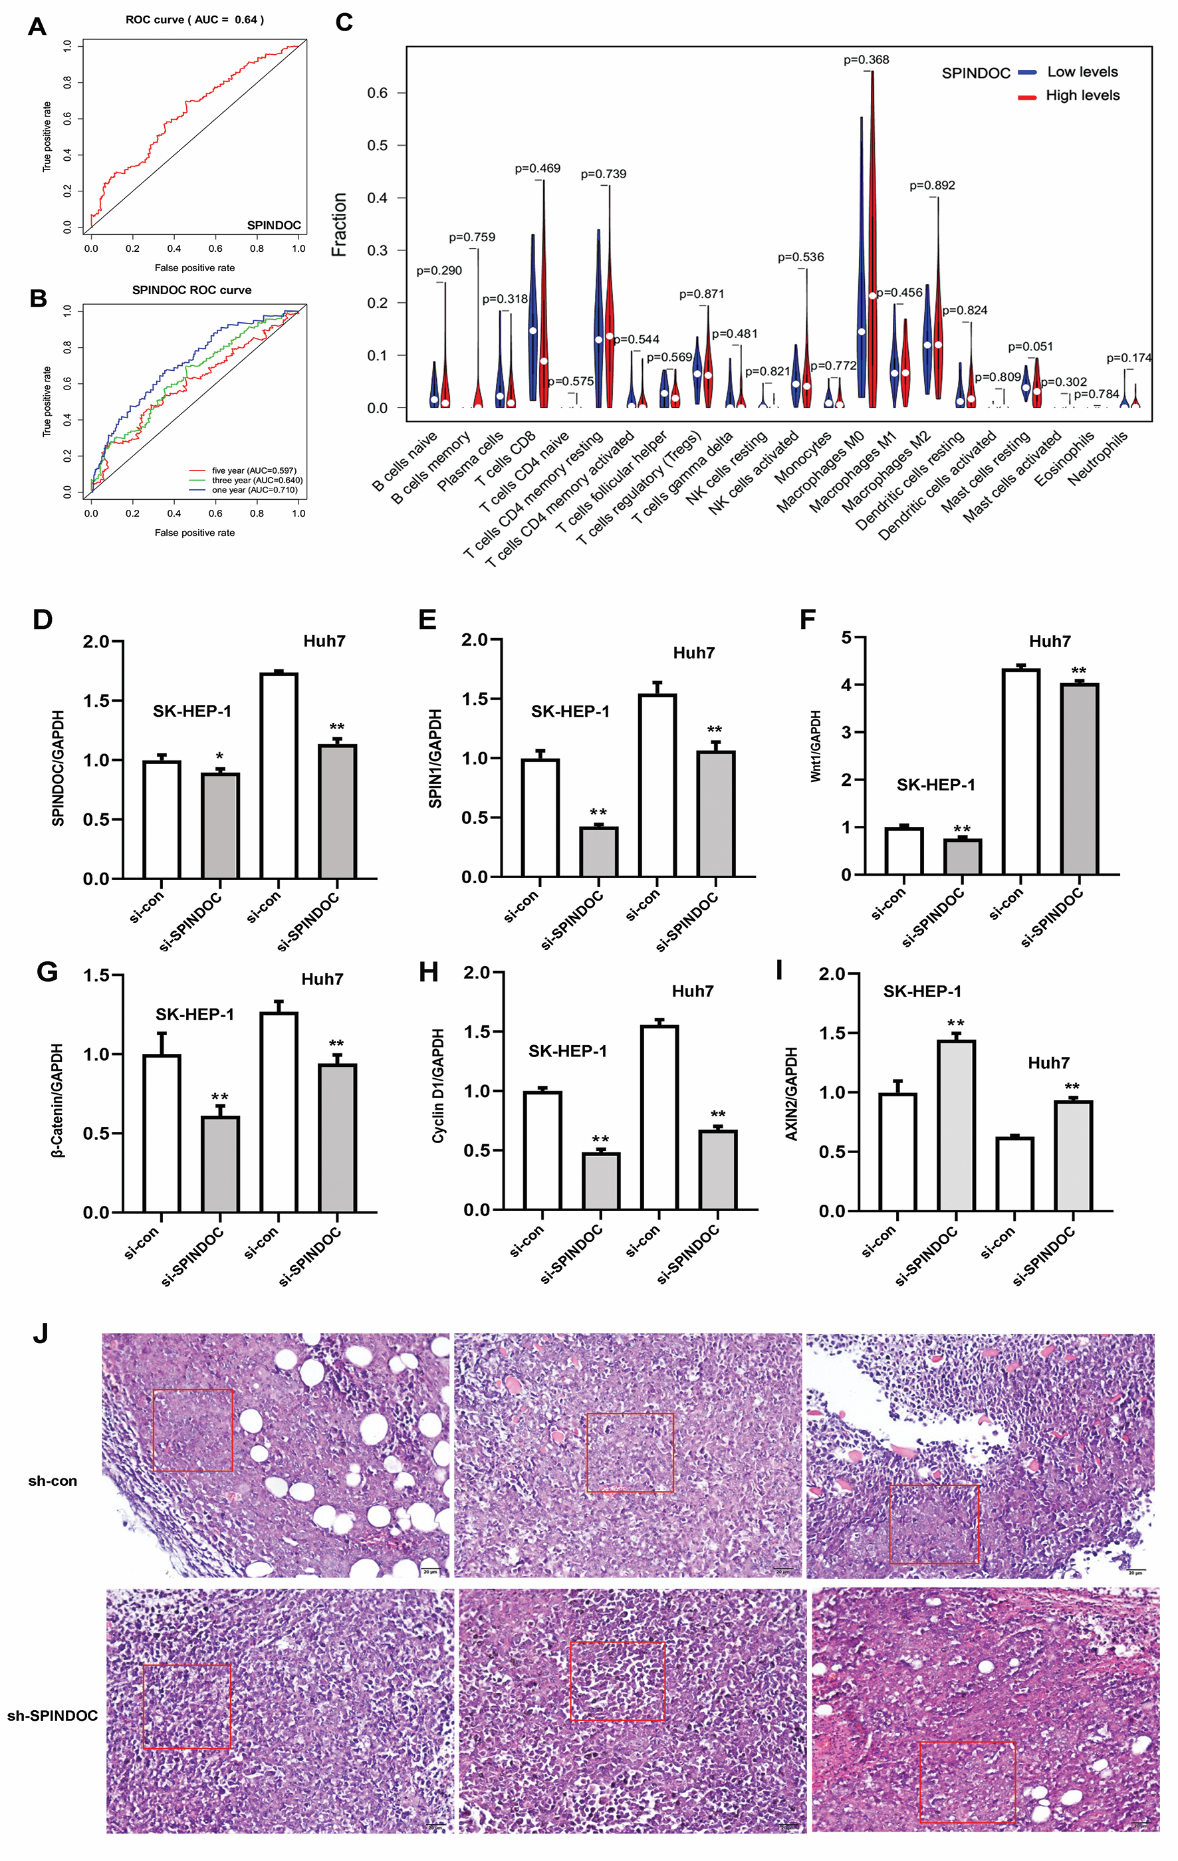


Supplementary Fig 1. Prediction ROC curve of SPINDOC expression in HCC, relationship between SPINDOC expression and immune cell invasion; the changes of SPINDOC-related factor proteins in Wnt/β-catenin signaling pathway after SPINDOC gene knockout were verified by cell experiments; comparison of HE staining of subcutaneous transplanted tumor tissue after SPINDOC gene knockout in nude mice. (A) The AUC of ROC curve at SPINDOC expression levels was observed to be 0.64; (B) Multiple ROC curves showed the prediction value of SPINDOC expression; (C) CIBERSORT analysis showed no significant difference in immune cell invasion between SPINDOC high-low expression groups in liver cancer tissues; (D-I) Western blot analysis to detect the expression of the various key proteins involved in the Wnt/β-Catenin signal pathway after SPINDOC gene was knocking down in HCC cells; (J) The hematoxylin-eosin (HE) staining pathological sections of the subcutaneous tumor after SPINDOC was knocked out. Red square frame: HE staining pathological sections showed that subcutaneous tumor tissues in the control group were closely arranged without obvious necrosis. In the sh-SPINDOC group, the subcutaneous tumor tissue was arranged loosely with obvious necrosis. Scale bars: 20μm. *,*P*<0.05; **,*P*<0.01. SPINDOC: SPIN1 docking protein; ROC: Receiver Operating Characteristic; AUC: Area Under Curve; si-con: siRNA-control; si-SPINDOC: siRNA-SPINDOC; sh-con: shRNA-control; sh-SPINDOC: shRNA-SPINDOC.
